# Supplementary material for: An MRI radiomics approach to predict survival and tumour-infiltrating macrophages in gliomas
Source: PubMed Central journal article supplement — Brain. 2022 Feb 6;145(3):1151–61. doi: 10.1093/brain/awab340 (PMC9050568; doi:10.1093/brain/awab340), 2022-02-06
Supplement: awab340_supplementary_data.pdf [file awab340_supplementary_data.pdf]

## Supplementary Figure Legends

**Supplementary Figure 1. Schema of our strategy to identify prognostic radiomic features.** (A) The overlap of RFs screened by different methods. (B) Landscape of risk grouping of different RF prognostic models. (C) The relationship between the selected RFs by different methods and macrophage enrich score in LGG and GBM.

**Supplementary Figure 2. The relationship between prognostic RFs and tumor cell functions in the external validation cohort.** (A) The top 10 significant correlations between RFs and cell fractions in the external validation cohort. (B) The *pearson* correlation between RFs and macrophage cells signature in the external validation cohort. (C) The *pearson* correlation between RFs and endothelial cells signature in the external validation cohort.

**Supplementary Figure 3. The cell composition of primary culture cells in patient PDC1.** Single-cell transcriptional profiling identifies 7 discrete cell populations across immune cells and non-immune cells. Normalized expression of macrophage markers overlaid on tSNE plot. The gene includes PTPRC, ITGAM, CD14, FCGR3A, CD86, CD68, CD163.

**Supplementary Figure 4. The cell composition of primary culture cells in patient PDC14.** Single-cell transcriptional profiling identifies 5 discrete cell populations across immune cells and non-immune cells. Normalized expression of macrophage markers overlaid on tSNE plot. The gene include CD68, CD163, CD8A, CD3D, GZMA, PTPRC, ITGAM, CD14, FCGR3A, and CD86.

**Supplementary Figure 5. The cell composition of primary culture cells in patient PDC7.** Single-cell transcriptional profiling identifies 6 discrete cell populations across immune cells and non-immune cells. Normalized expression of macrophage markers overlaid on tSNE plot. The gene include CD68, CD163, CD8A, CD3D, GZMA, PTPRC, ITGAM, CD14, FCGR3A and CD86.

**Supplementary Figure 6. The cell composition of primary culture cells in patient PDC12.** Single-cell transcriptional profiling identifies 5 discrete cell populations across immune cells and non-immune cells. Normalized expression of macrophage markers overlaid on tSNE plot. The gene include PTPRC, ITGAM, CD14, FCGR3A, CD86, CD68, and CD163.

**Supplementary Figure 7. Clinical outcome of immune related Macrophage cell signatures in patients with gliomas in high and low RF scores groups.** (A-B) Kaplan–Meier survival analysis was performed between the samples with high and low macrophage cell enrichment scores. Compare the gene expression between low and high groups of RF scores. (C-D) In transcriptome sequencing data of gliomas in the discovery cohort, macrophage markers were enriched in high-risk samples and predicted poor prognosis.

**Supplementary Figure 8. The *pearson* correlation between RFs and macrophage cells signature in LGG and GBM, respectively.**

**Supplementary Figure 9. IHC staining displayed the RF related macrophage markers of MS4A4A, STAB1 and COLEC12.** The scatter diagram showed the expression level of these markers in high risk and low risk samples in LGG (A, C and E) and GBM (B, D and F), respectively. Kaplan-Meier survival analysis was performed between the samples with high and low expression of macrophage markers in LGG (A, C and E) and GBM (B, D and F), respectively.

**Supplementary Figure 10. Verification of the prediction model based on deep learning algorithm (Deep learning model 1) in predicting the prognosis of glioma.** (A) Work flow of the deep learning method (Deep learning Model 1). (B) *P*-value distribution representing  $-\log_{10}(P\text{-value})$  (x-axis) and times(y-axis) for 300 times in cross validation. Kaplan-Meier curves showed the overall survival of in low risk and high risk patients grouping by deep learning method (Deep learning Model 1). Overall survival of patients in high risk group was significantly shorter in the discovery (Tiantan) (C), external validation (TCGA) (E) and prospective validation (G) cohorts. Univariate

and multivariate COX survival analysis of the predicted risk group and other prognostic factors in the discovery (Tiantan) **(D)**, external validation (TCGA) **(F)** and prospective validation **(H)** cohorts. The age is numerical variables and the risk group, WHO Grade, IDH Status, 1p/19q Codel Status and TCGA Subtype are categorical variables.

**Supplementary Figure 11. Verification of the prediction model based on deep learning algorithm (Deep learning Model 2) in predicting the prognosis of glioma.**

**(A)** Work flow of the deep learning method (Deep learning Model 2). **(B)** *P*-value distribution representing  $-\log_{10}(P\text{-value})$  (x-axis) and times(y-axis) for 300 times in cross validation. Kaplan-Meier curves showed the overall survival of in low risk and high risk patients grouping by deep learning method (Deep learning Model 2). Overall survival of patients in high risk group was significantly shorter in the discovery (Tiantan) **(C)**, external validation (TCGA) **(E)** and prospective validation **(G)** cohorts. Univariate and multivariate COX survival analysis of the predicted risk group and other prognostic factors in the discovery (Tiantan) **(D)**, external validation (TCGA) **(F)** and prospective validation **(H)** cohorts. The age is numerical variables and the risk group, WHO Grade, IDH Status, 1p/19q Codel Status and TCGA Subtype are categorical variables.

**Supplementary Figure 12. Verification of the prediction model based on deep learning algorithm (Deep learning Model 3) in predicting the prognosis of glioma.**

**(A)** Work flow of the deep learning method (Deep learning Model 3). **(B)** *P*-value distribution representing  $-\log_{10}(P\text{-value})$  (x-axis) and times(y-axis) for 300 times in cross validation. Kaplan-Meier curves showed the overall survival of in low risk and high risk patients grouping by deep learning method (Deep learning Model 3). Overall survival of patients in high risk group was significantly shorter in the discovery (Tiantan) **(C)**, external validation (TCGA) **(E)** and prospective validation **(G)** cohorts. Univariate and multivariate COX survival analysis of the predicted risk group and other prognostic factors in the discovery (Tiantan) **(D)**, external validation (TCGA) **(F)** and prospective validation **(H)** cohorts. The age is numerical variables and the risk group, WHO Grade, IDH Status, 1p/19q Codel Status and TCGA Subtype are categorical variables.

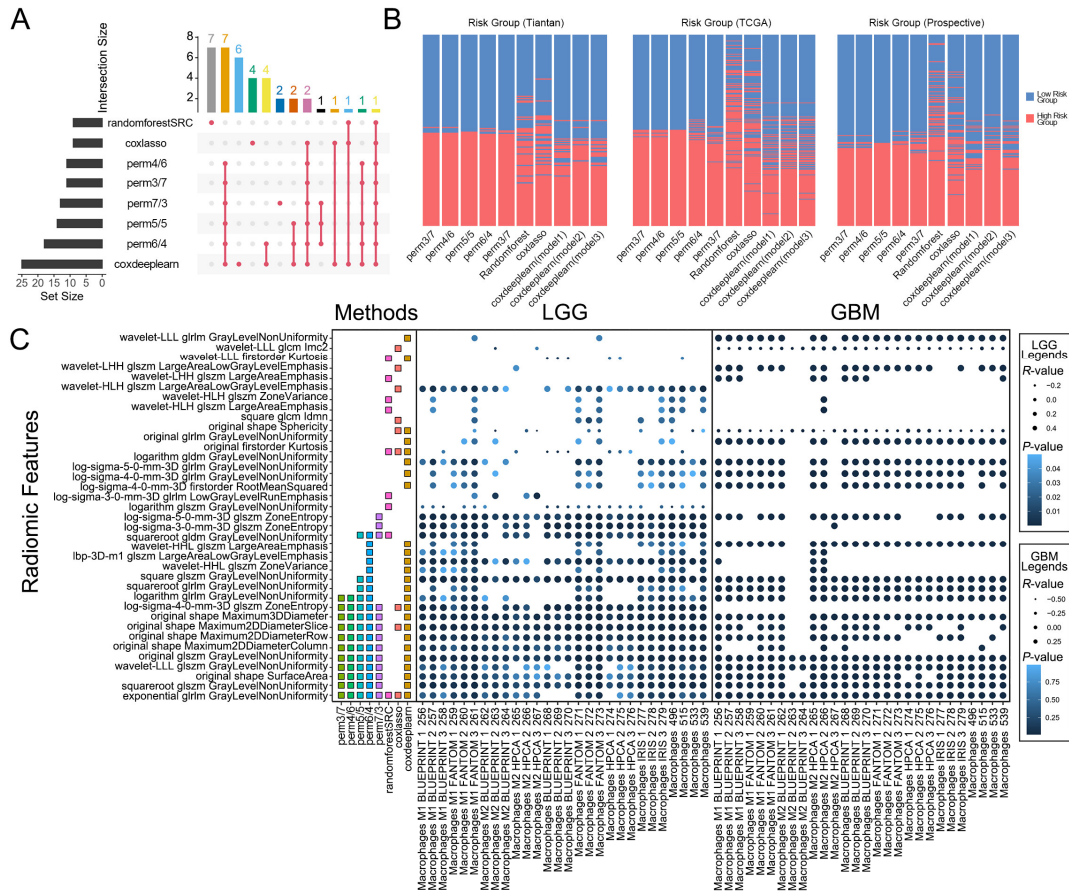

**Supplementary Figure 1. Schema of our strategy to identify prognostic radiomic features.**

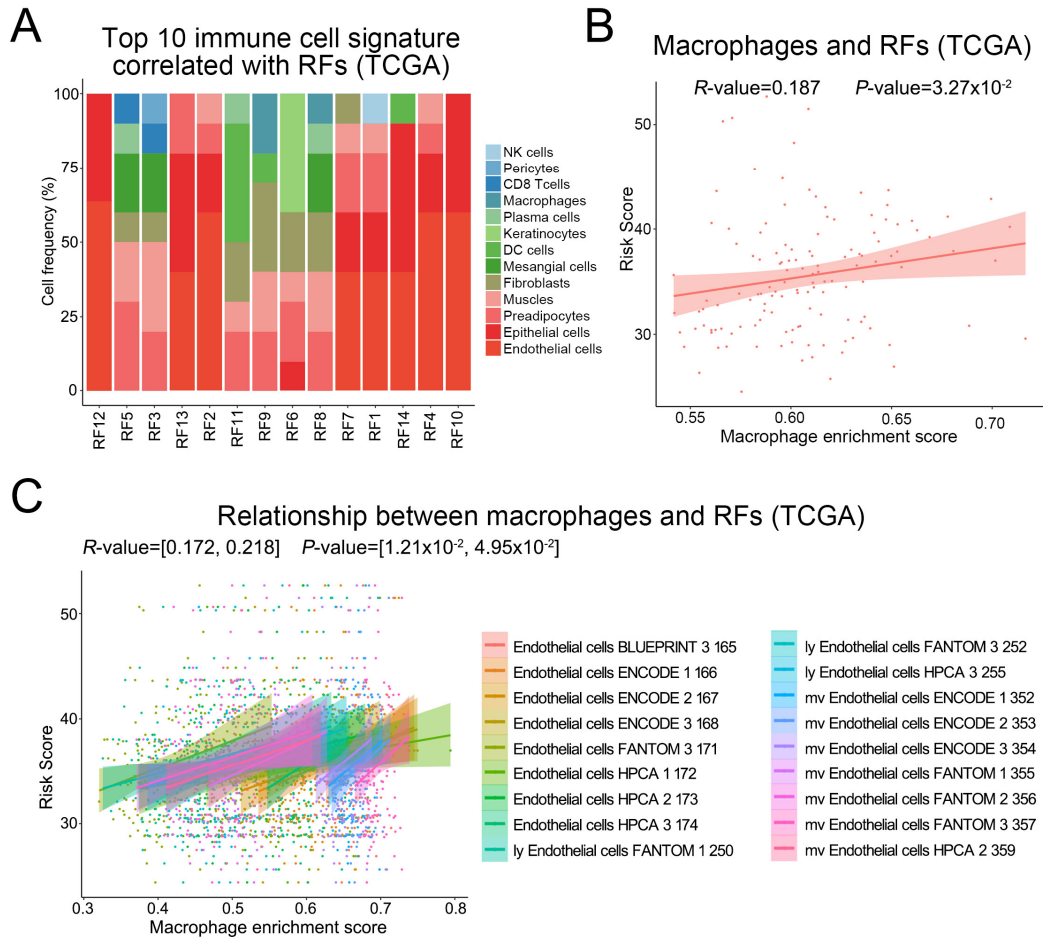

**Supplementary Figure 2. The relationship between prognostic RFs and tumor cell functions in the external validation cohort.**

### Cell composition of primary culture cells (PDC1)

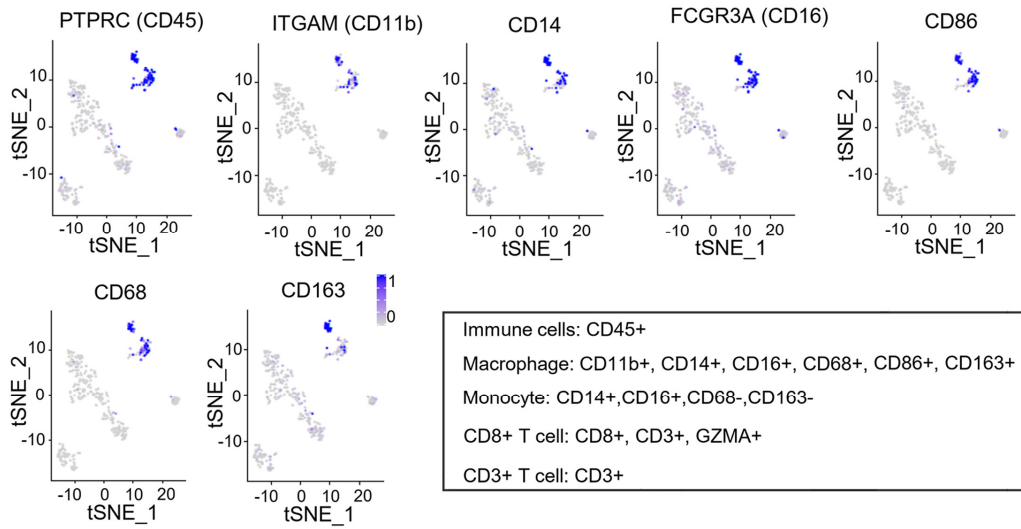

**Supplementary Figure 3. The cell composition of primary culture cells in patient PDC1.**

### Cell composition of primary culture cells (PDC14)

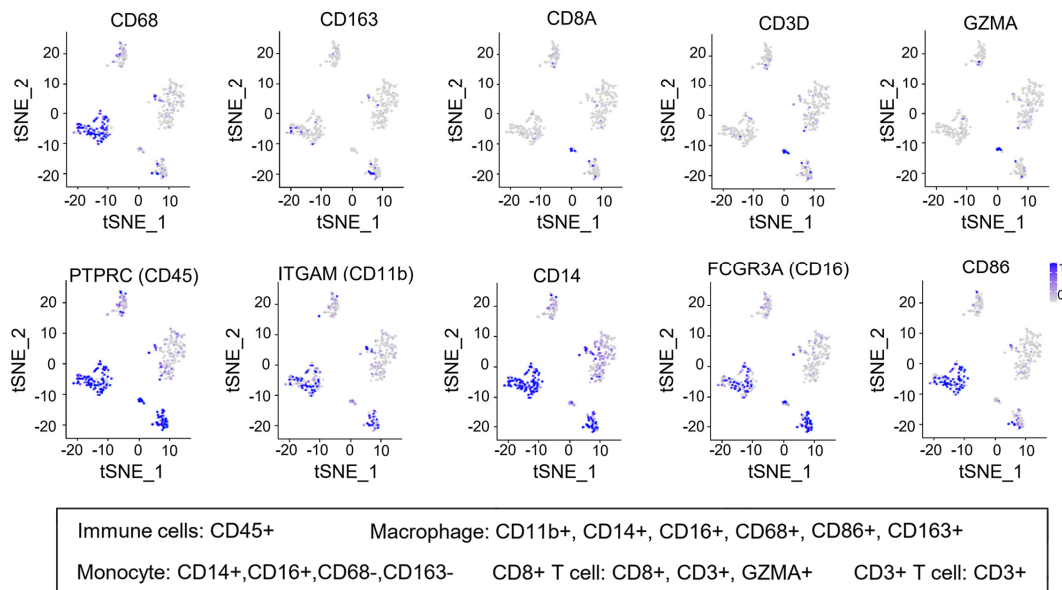

**Supplementary Figure 4. The cell composition of primary culture cells in patient PDC14.**

### Cell composition of primary culture cells (PDC7)

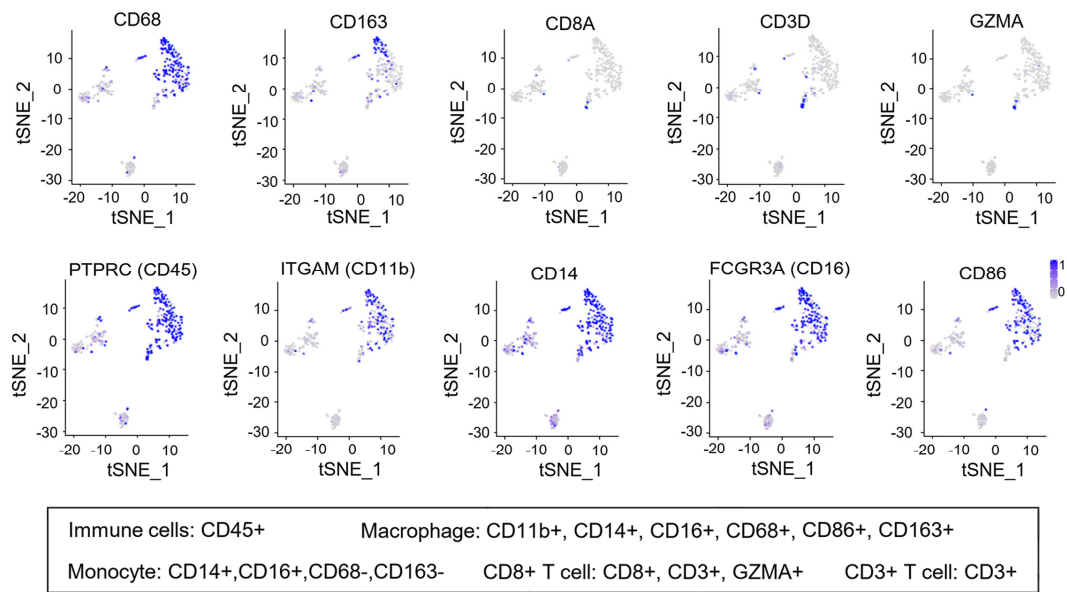

**Supplementary Figure 5. The cell composition of primary culture cells in patient PDC7.**



Cell composition of primary culture cells (PDC12)

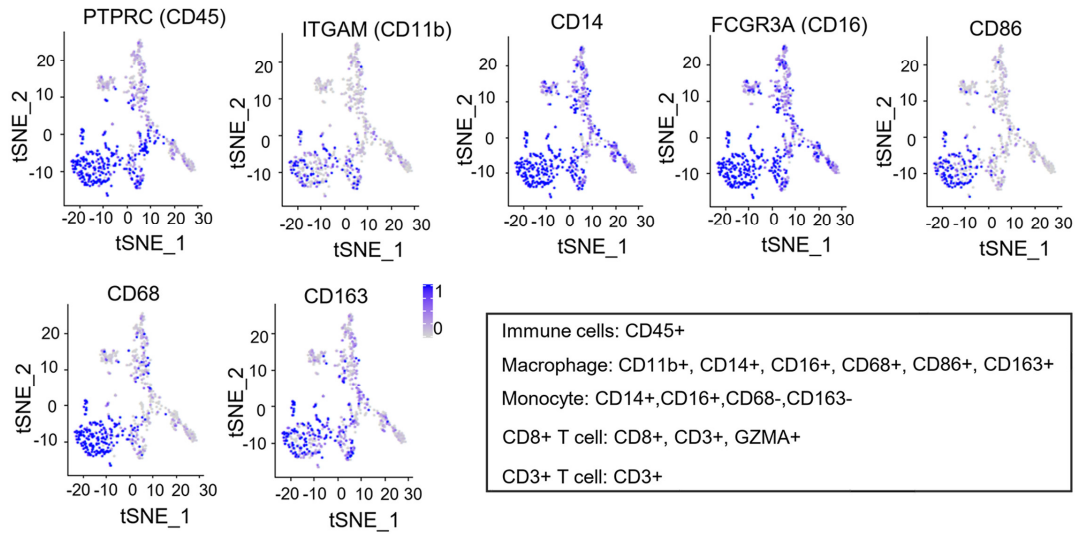

**Supplementary Figure 6. The cell composition of primary culture cells in patient PDC12.**

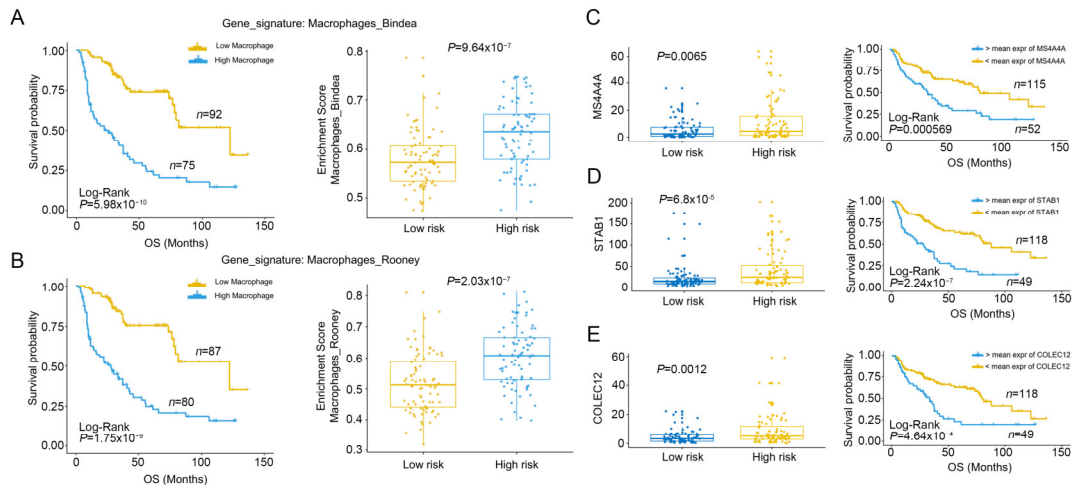

**Supplementary Figure 7. Clinical outcome of immune related Macrophage cell signatures in patients with gliomas in high and low RF scores groups.**

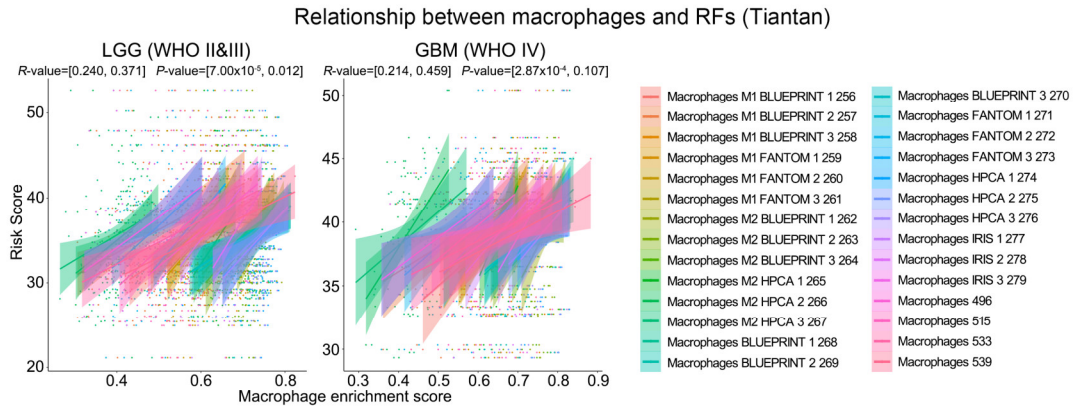

**Supplementary Figure 8. The *pearson* correlation between RFs and macrophage cells signature in LGG and GBM, respectively.**

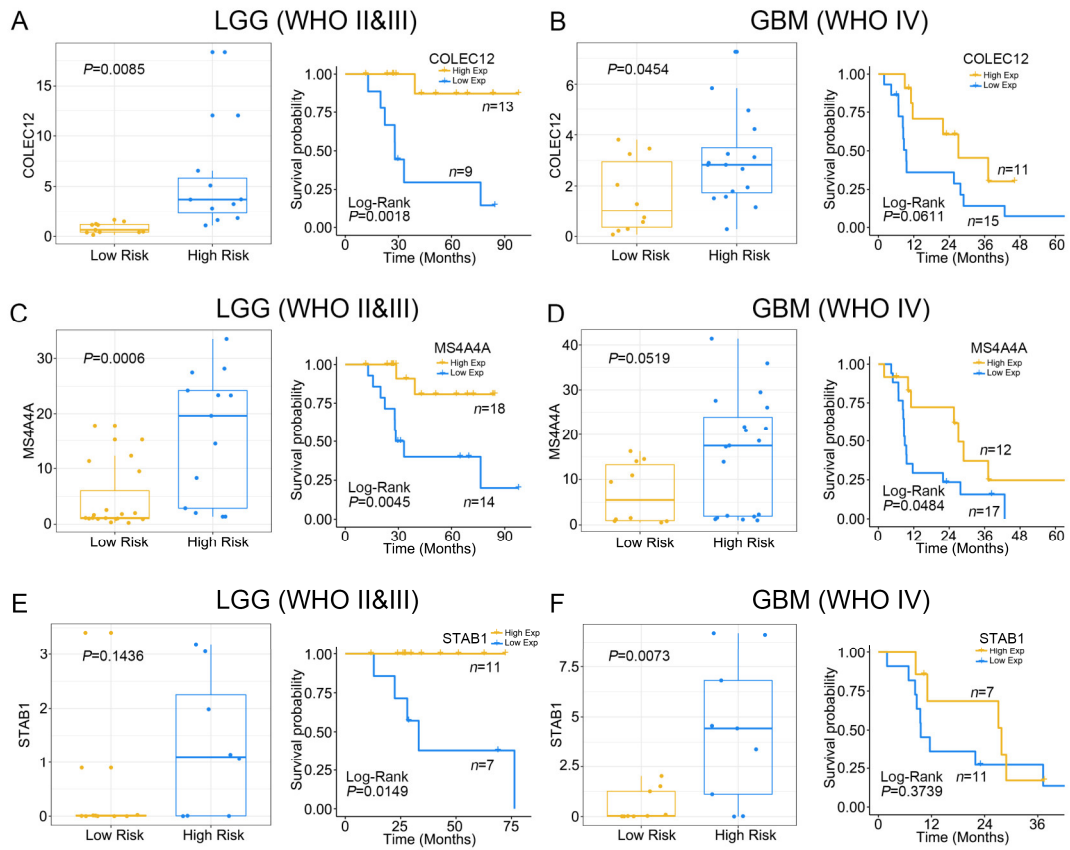

**Supplementary Figure 9. IHC staining displayed the RF related macrophage markers of MS4A4A, STAB1 and COLEC12.**

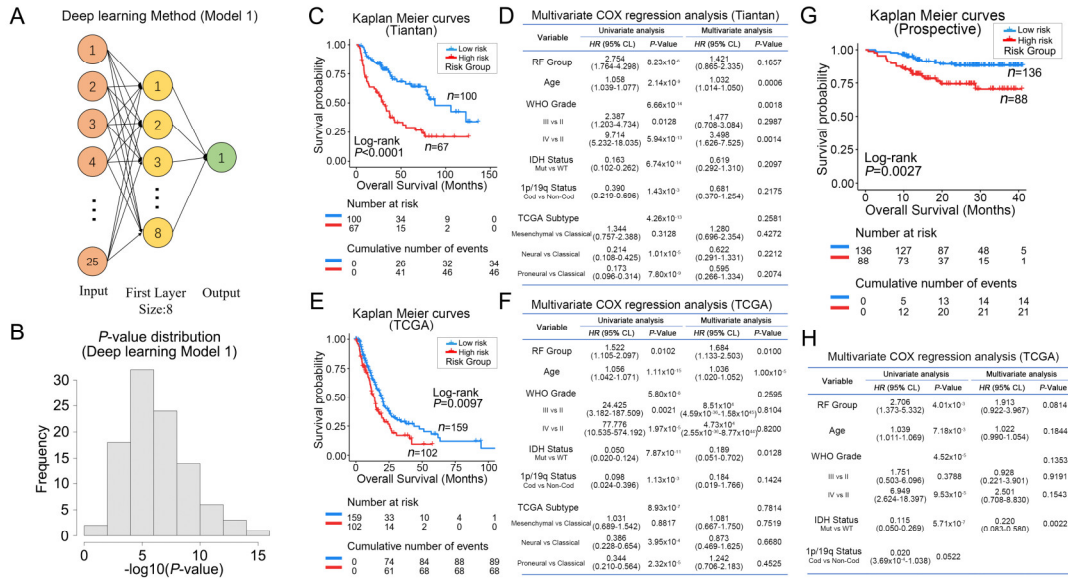

**Supplementary Figure 10. Verification of the prediction model based on deep learning algorithm (Deep learning model 1) in predicting the prognosis of glioma.**

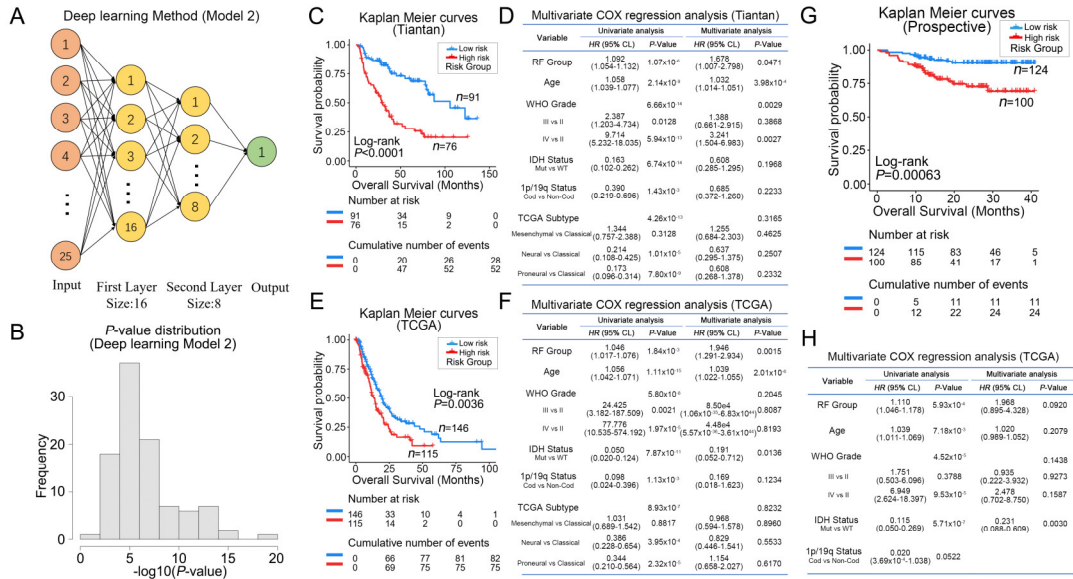

**Supplementary Figure 11. Verification of the prediction model based on deep learning algorithm (Deep learning Model 2) in predicting the prognosis of glioma.**

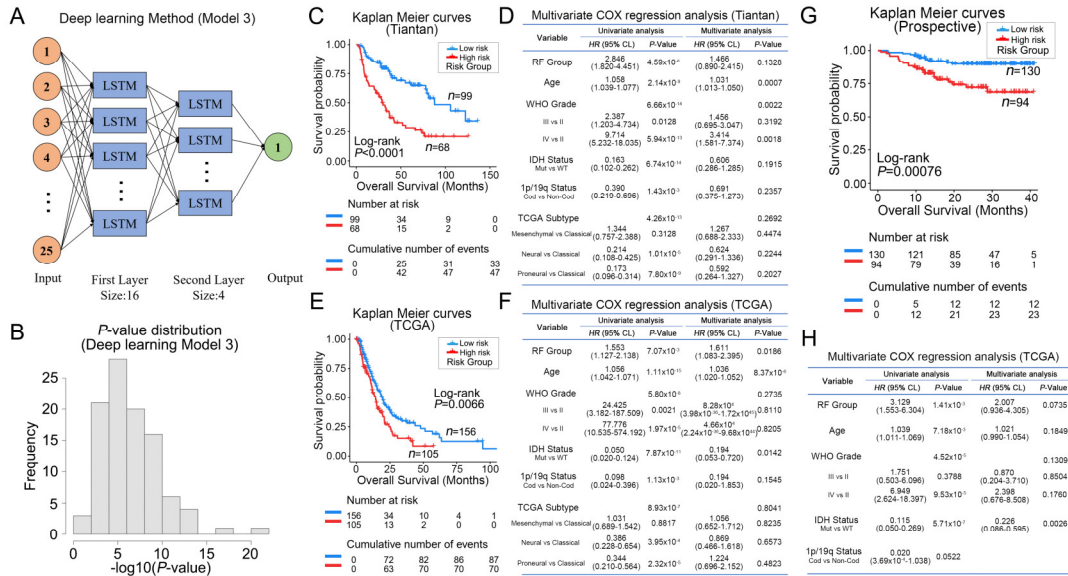

**Supplementary Figure 12. Verification of the prediction model based on deep learning algorithm (Deep learning Model 3) in predicting the prognosis of glioma.**

**Supplementary Table 1 Characteristics of Patients in three independent cohorts**

| <b>Characteristic</b> | <b>Discovery cohort<br/>(Tiantan)</b> | <b>External Validation<br/>Cohort<br/>(TCGA)</b> | <b>Prospective Validation Cohort<br/>(Beijing Tiantan Hospital)</b> | <b>P-value</b>       |
|-----------------------|---------------------------------------|--------------------------------------------------|---------------------------------------------------------------------|----------------------|
| Age (years)           |                                       |                                                  |                                                                     | <0.0001 <sup>a</sup> |
| Mean                  | 44.08                                 | 54.08                                            | 45.60                                                               |                      |
| SD                    | 12.20                                 | 16.23                                            | 13.1                                                                |                      |
| Gender (No.)          |                                       |                                                  |                                                                     | 0.0339 <sup>b</sup>  |
| Male                  | 107                                   | 141                                              | 115                                                                 |                      |
| Female                | 60                                    | 120                                              | 109                                                                 |                      |
| WHO Grade (No.)       |                                       |                                                  |                                                                     | <0.0001 <sup>b</sup> |
| II                    | 65                                    | 49                                               | 77                                                                  |                      |
| III                   | 44                                    | 45                                               | 61                                                                  |                      |
| IV                    | 58                                    | 167                                              | 86                                                                  |                      |
| IDHI Status (No.)     |                                       |                                                  |                                                                     | <0.0001 <sup>b</sup> |
| Mutation              | 100                                   | 75                                               | 129                                                                 |                      |
| Wildtype              | 67                                    | 157                                              | 70                                                                  |                      |
| Not Available         | 0                                     | 29                                               | 25                                                                  |                      |
| Ip/19q Status (No.)   |                                       |                                                  |                                                                     | <0.0001 <sup>b</sup> |
| Co-deletion           | 54                                    | 22                                               | 62                                                                  |                      |
| Non Co-deletion       | 112                                   | 231                                              | 98                                                                  |                      |
| Not Available         | 1                                     | 8                                                | 64                                                                  |                      |

<sup>a</sup>Kruskal-Wallis test<sup>b</sup>Chi-square test



**Supplementary Table 2 Characteristics of Patients in the Discovery Cohort (Tiantan)**

| <b>Characteristic</b> | <b>Low Risk</b> | <b>High Risk</b> | <b>P-value</b>       |
|-----------------------|-----------------|------------------|----------------------|
| Age (years)           |                 |                  | 0.1319 <sup>a</sup>  |
| Mean                  | 42.77           | 45.41            |                      |
| SD                    | 10.86           | 13.43            |                      |
| Gender (No.)          |                 |                  | 0.2178 <sup>b</sup>  |
| Male                  | 50              | 57               |                      |
| Female                | 34              | 26               |                      |
| WHO Grade (No.)       |                 |                  | <0.0001 <sup>b</sup> |
| II                    | 47              | 18               |                      |
| III                   | 21              | 23               |                      |
| IV                    | 16              | 42               |                      |
| IDHI Status (No.)     |                 |                  | 0.015 <sup>b</sup>   |
| Mutation              | 58              | 42               |                      |
| Wildtype              | 26              | 41               |                      |
| Ip/19q Status (No.)   |                 |                  | 0.1214 <sup>b</sup>  |
| Co-deletion           | 32              | 22               |                      |
| Non Co-deletion       | 52              | 60               |                      |
| Not Available         | 0               | 1                |                      |

<sup>a</sup>Mann Whitney test<sup>b</sup>Chi-square test

**Supplementary Table 3 Characteristics of Patients in the External Validation Cohort (TCGA)**

| <b>Characteristic</b> | <b>Low Risk</b> | <b>High Risk</b> | <b>P-value</b>      |
|-----------------------|-----------------|------------------|---------------------|
| Age (years)           |                 |                  | 0.0645 <sup>a</sup> |
| Mean                  | 52.18           | 55.93            |                     |
| SD                    | 16.05           | 16.24            |                     |
| Gender (No.)          |                 |                  | 0.0561 <sup>b</sup> |
| Male                  | 62              | 79               |                     |
| Female                | 67              | 53               |                     |
| WHO Grade (No.)       |                 |                  | 0.0001 <sup>b</sup> |
| II                    | 36              | 13               |                     |
| III                   | 26              | 19               |                     |
| IV                    | 67              | 100              |                     |
| IDHI Status (No.)     |                 |                  | 0.0166 <sup>b</sup> |
| Mutation              | 47              | 28               |                     |
| Wildtype              | 72              | 85               |                     |
| Not Available         | 10              | 19               |                     |
| Ip/19q Status (No.)   |                 |                  | 0.1744 <sup>b</sup> |
| Co-deletion           | 14              | 8                |                     |
| Non Co-deletion       | 112             | 119              |                     |
| Not Available         | 3               | 5                |                     |

<sup>a</sup>Mann Whitney test<sup>b</sup>Chi-square test

**Supplementary Table 4 Characteristics of Patients in the Prospective Validation Cohort (Beijing Tiantan Hospital)**

| <b>Characteristic</b> | <b>Low Risk</b> | <b>High Risk</b> | <b>P-value</b>       |
|-----------------------|-----------------|------------------|----------------------|
| Age (years)           |                 |                  | 0.0006 <sup>a</sup>  |
| Mean                  | 42.73           | 49.29            |                      |
| SD                    | 13.47           | 11.68            |                      |
| Gender (No.)          |                 |                  | 0.0715 <sup>b</sup>  |
| Male                  | 58              | 57               |                      |
| Female                | 68              | 41               |                      |
| WHO Grade (No.)       |                 |                  | <0.0001 <sup>b</sup> |
| II                    | 60              | 17               |                      |
| III                   | 33              | 28               |                      |
| IV                    | 33              | 53               |                      |
| IDHI Status (No.)     |                 |                  | 0.008 <sup>b</sup>   |
| Mutation              | 84              | 45               |                      |
| Wildtype              | 32              | 38               |                      |
| Not Available         | 10              | 15               |                      |
| Ip/19q Status (No.)   |                 |                  | 0.1925 <sup>b</sup>  |
| Co-deletion           | 40              | 22               |                      |
| Non Co-deletion       | 53              | 45               |                      |
| Not Available         | 33              | 31               |                      |

<sup>a</sup>Mann Whitney test<sup>b</sup>Chi-square test
